1 **Title: Temperatures that sterilise males better predict global distributions**  
2 **of species than lethal temperatures**

3  
4 **Authors:** Steven R Parratt<sup>1\*</sup>, Benjamin S Walsh<sup>1</sup>, Soeren Metelmann<sup>2</sup>, Nicola White<sup>1</sup>, Andri  
5 Manser<sup>1†</sup>, Amanda J Bretman<sup>3</sup>, Ary A Hoffmann<sup>4</sup>, Rhonda R Snook<sup>5</sup>, Tom AR Price<sup>1\*</sup>

6 **Affiliations:**

7 <sup>1</sup> Department of Evolution, Ecology and Behavior, University of Liverpool, Liverpool, UK.

8 <sup>2</sup> Health Protection Research Unit in Emerging and Zoonotic Infections, University of  
9 Liverpool, Liverpool, UK.

10 <sup>3</sup> Faculty of Biological Sciences, University of Leeds, Leeds, UK.

11 <sup>4</sup> School of BioSciences, Bio21 Institute, University of Melbourne, Australia.

12 <sup>5</sup> Department of Zoology, Stockholm University, Stockholm, Sweden

13

14 \*Correspondence to: [s.parratt@liverpool.ac.uk](mailto:s.parratt@liverpool.ac.uk)

15 †Current Address: Department of Evolutionary Biology and Environmental Studies,  
16 University of Zürich, Zürich, Switzerland

17

18 **Abstract:**

19 Climate change is well understood to be a major threat to biodiversity, but sublethal impacts of  
20 high temperatures, such as reduced fertility, have been poorly studied. We examined a panel of  
21 43 *Drosophila* species, finding that 19 experience significant fertility loss at temperatures up to  
22 4.3°C cooler than their lethal temperature limits. We found that upper thermal fertility limits  
23 explain global distributions of species better than limits based on lethal temperatures. This  
24 suggests that limits to reproduction, rather than limits to survival, can underpin species  
25 distributions in nature. Given that high temperatures impair male fertility across a broad range of  
26 animals and plants, many species may be at increased risk of extinction due to inability to  
27 reproduce at high temperatures.

28

29 **One Sentence Summary:**

30 Species' distributions and response to climate change are strongly affected by the temperature at  
31 which they lose fertility.

32 **Main Text:**

33 We urgently need to understand how rises in temperature will impact biodiversity(1). To do this  
34 we must understand the physiological, behavioral and evolutionary factors that underpin  
35 species' current thermal distributions(2, 3). Laboratory-derived estimates of the highest  
36 temperatures at which an organism can function provide measures of species' thermal  
37 tolerances(4). These measures of upper thermal limits have improved the accuracy of  
38 functional species distribution models(5) which can be extrapolated to climate change  
39 scenarios, allowing ecologists to forecast future species distributions(6). Accurate predictions of  
40 species' distributions are invaluable for prioritizing conservation efforts(7) and predicting the  
41 invasion of disease vectors(8).

42  
43 Upper thermal tolerance limits are usually based on the temperatures that cause loss of  
44 coordinated movement, coma, respiratory failure, or death: the species' critical thermal limit.  
45 Despite these being measured in artificial laboratory conditions, critical limits correlate  
46 reasonably well with species' distributions(4) and have been used to estimate species' capacity  
47 to tolerate temperature increases across their current distribution range; their 'thermal safety  
48 margins'(3). However, persistence of populations is not determined solely by survival, but also  
49 by reproduction. There is evidence that sub-lethal temperatures cause losses in fertility in  
50 plants(9), insects(10-12), fish(13), aquatic invertebrates(14), birds(15) and mammals, including  
51 humans(16). These effects include direct impacts on physiological processes (10, 15, 17) and  
52 indirect influences via changes in behavior and phenology(18). Previously, we proposed that  
53 temperatures at which fertility is lost, the thermal fertility limits (TFLs) (18), may be a critical

54 but understudied part of species' true upper thermal limits. If TFLs are lower than critical limits,  
55 then many organisms will be more vulnerable to climate change than currently thought. If TFLs  
56 and critical limits correlate poorly then we may misidentify which species are most at risk from  
57 rising temperatures. Critically, we need to know whether TFLs measured in laboratory  
58 conditions can predict the distribution of natural populations better than measures of critical  
59 limits.

60

61 Here, we recorded three measures of upper thermal limits in adult males from 43 species of  
62 *Drosophila* fruit flies. First, we exposed flies to a 4-hour static heat stress at a range of  
63 temperatures from benign through to lethal(19). From these data we estimated the  
64 temperature at which 80% of living males are sterilized (TFL80) and the temperature that is  
65 lethal to 80% of individuals (LT80). Fertility was assayed at two time points: (i) over 1-6 days  
66 post-heat, to capture any immediate sterilizing effect of heat, and (ii) 7-days after heat-stress to  
67 capture any recovery of fertility or delayed sterility. These data allow us to compare fertility and  
68 survival thresholds under identical conditions. In a separate experiment, we measured the  
69 temperature at which males lose coordinated motor function under ramping temperature  
70 conditions (CTmax). This measure is widely used across animal systems to predict species'  
71 sensitivity to climate change (3, 4).

72

73 We found that 11 of 43 species experience an 80% loss in fertility at cooler-than-lethal  
74 temperatures immediately following heat-stress (Fig S1). Interestingly, rather than seeing a  
75 recovery of fertility over time, the impact of high temperatures on fertility was more

76 pronounced 7-days post heat stress (Fig 1). Using this delayed measure of fertility, nearly half of  
77 species (19/43) showed significant fertility loss. The difference between lethal and fertility  
78 limits ranged from 0°C to 4.3°C (mean =  $1.15 \pm 0.22^\circ\text{C}$ ), and LT80 and TFL80 predict dramatically  
79 different relative ranking of species' robustness to high temperature (Fig S2).

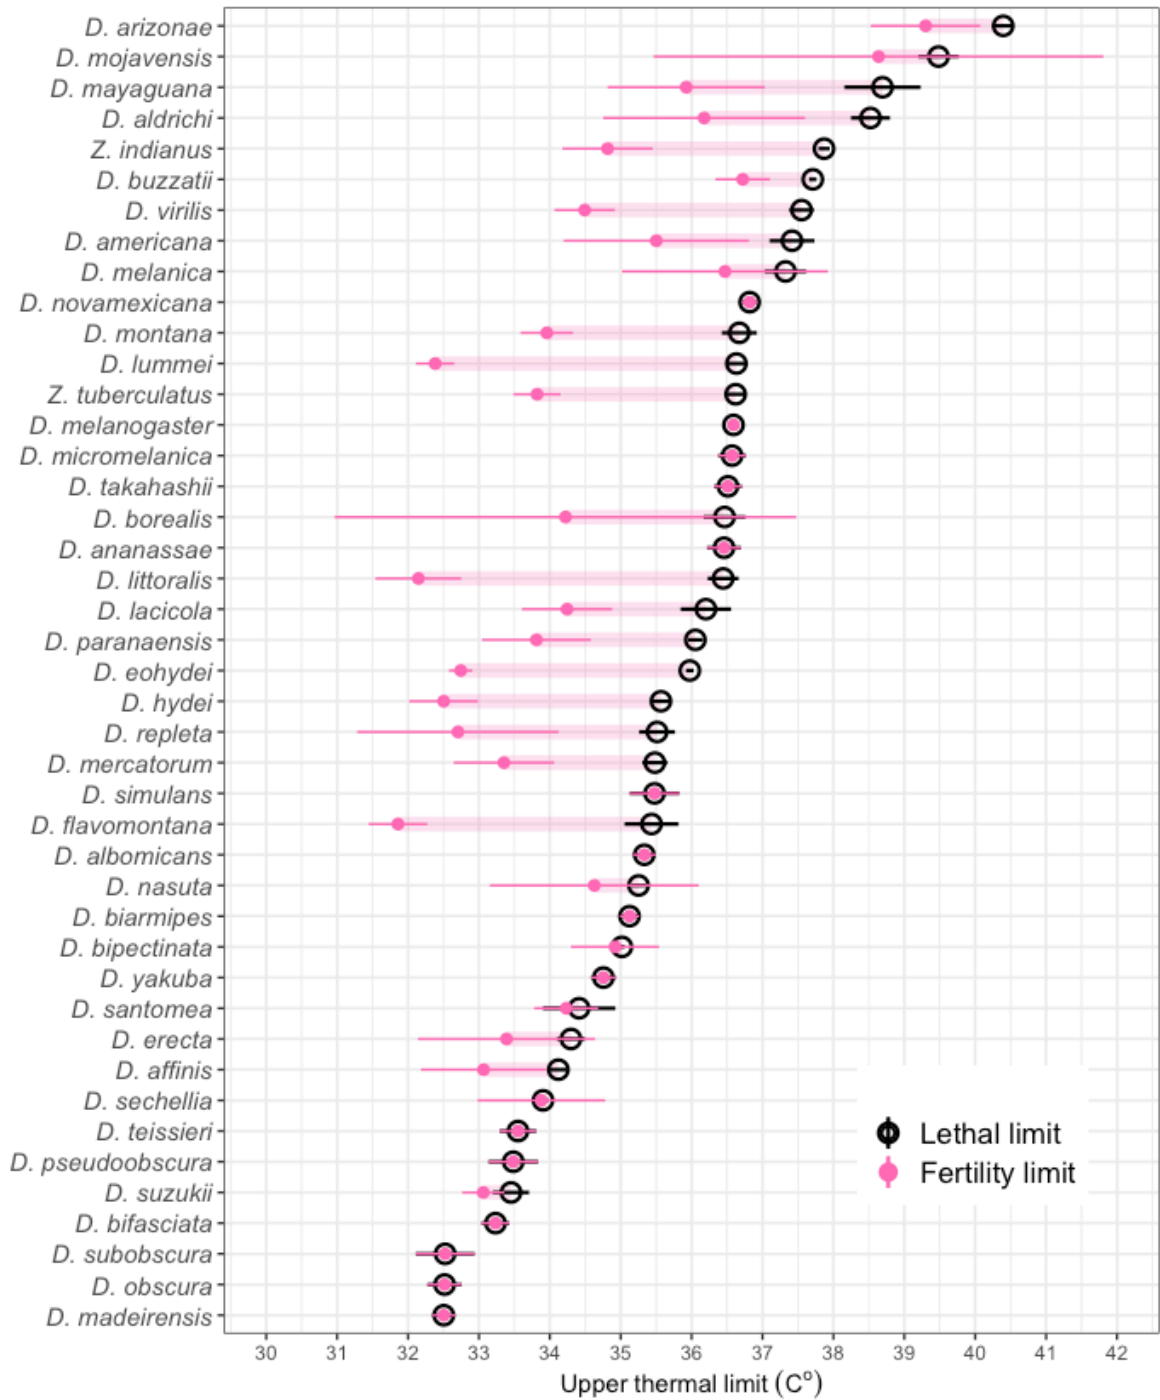

80

81 Figure 1: Incorporating fertility loss into estimates of upper thermal limits dramatically

82 changes the ranking of species' thermal tolerance. LT80 (black circles) and TFL80 (pink

83 circles). 95% CI are shown as error bars for both measures. Fertility loss measured seven  
84 days post heat stress to account for delayed sterility effects.

85  
86 These data show that fertility loss at sub-lethal temperatures is common across *Drosophila*. This  
87 suggests that ignoring TFLs has led to the overestimation of thermal tolerance for many species.  
88 This may be particularly problematic for efforts to preserve rare and endangered species or  
89 control emerging pests and disease vectors. For example, we found that the crop pest species  
90 *Zaprionus indianus* (African fig fly) has a relatively high upper lethal limit (LT80 = 37.9°C) but a  
91 much cooler upper fertility limit (TFL80 = 34.8°C). This switches the species' thermal hardiness  
92 rank from rank 5<sup>th</sup> to 17<sup>th</sup> of species here (Fig S2). This pest is currently expanding throughout  
93 the New World, and this disparity could have marked consequences for forecasting its putative  
94 range and hence where to concentrate control efforts(20).

95  
96 Our work demonstrates that TFLs can be substantially lower than lethal temperatures when  
97 measured under the same conditions in the laboratory. However, the key question is whether  
98 TFLs actually shape organisms' distributions in nature. To test this, we used existing data on the  
99 distribution of each *Drosophila* species and integrated this with global climate data for each  
100 location to estimate the maximum temperatures species are likely to encounter in nature(19).  
101 Previous work using 95 *Drosophila* species found that the mean maximum summer  
102 temperature measured in this way correlates with CTmax for species from dry (<1000ml annual  
103 rainfall) but not from wet (>1000ml annual rainfall) environments(4). We first verified this  
104 finding in our smaller dataset of 43 species; CTmax significantly interacts with annual

105 precipitation to predict mean maximum environmental temperature (PGLS:  $F = 6.02_{1,39}$ ,  $P =$   
106  $0.018$ ,  $\text{adj}R^2 = 0.37$ ). We then tested whether either LT80 or TFL80 measured 7-days after heat  
107 stress are better predictors of species' thermal habitats than CTmax (Table S1). Across all  
108 species, we found that a model with TFL80 as the sole physiological predictor had the strongest  
109 correlation with mean maximum environmental temperature with no significant interaction  
110 with precipitation (PGLS: interaction term:  $F = 0.531_{1,39}$   $P = 0.471$ , TFL80:  $F = 39.3_{1,39}$   $P < 0.001$ ,  
111  $\text{adj}R^2 = 0.55$ ). LT80 also did not significantly interact with precipitation to predict environmental  
112 temperature but explained considerably less variation than TFL80 (PGLS: interaction term:  $F_{1,39}$   
113  $= 0.99$ ,  $P = 0.324$ , LT80:  $F_{1,39} = 0.99$ ,  $P = 0.324$ ,  $\text{adj}R^2 = 0.31$ ). Hence, TFL results in a 48% and  
114 77% improvement in the accuracy ( $R^2$ ) of species distribution predictions compared to CTmax  
115 and LT80 respectively. This dramatic improvement is largely due to TFL80 more accurately  
116 predicting the thermal range for species from high humidity environments (Table S2 & Fig S3).  
117 We find qualitatively similar results if both lethal and sterilizing limits are included as predictors  
118 in the same model (Table S3). The power of TFL80 to predict the distribution of *Drosophila* in  
119 nature strongly suggests that fertility losses due to high temperature are an important, but  
120 previously ignored, determinant of where species can persist.

121  
122 Predicting species' vulnerability to current and future temperature extremes is critical to  
123 protect biodiversity(1). "Thermal safety margins" measure species' vulnerability to climate  
124 change by taking the difference between an organism's physiological thermal limit and the  
125 maximum air temperature it is likely to experience(21). Although safety margins often use  
126 complex measures of environmental temperature to improve accuracy (e.g. microhabitat



127 availability, thermoregulation behavior of adults(3)), they remain reliant on relatively simple  
128 measures of thermal vulnerability. We find that TFL80 measured seven days after heat-stress  
129 produces significantly smaller safety margins than either LT80 or CTmax (LMER:  $\chi^2 = 40.36$ ,  $df =$   
130  $2$ ,  $P < 0.001$ , Fig S4). For populations that already live near the upper edge of their thermal  
131 range, TFL-based safety margins are reduced from  $2.59 \pm 3.08^\circ\text{C}$  under assumptions of LT80, to  
132  $1.43 \pm 2.80^\circ\text{C}$ . This predicts that 20 of the 43 species studied here are found in environments in  
133 which air temperatures exceed safety limits during the hottest part of the year. We illustrate  
134 the implications of this with case-study distribution models of *Drosophila flavomontana*; safety  
135 margins based on TFL80 predicts a 17.9% reduction in habitable landscape compared to an  
136 identical LT80-based model under current climate conditions (Fig 2A). This disparity between  
137 predictions based on sterility and lethality grew to 48.0% by the year 2070 under moderately  
138 optimistic future climate forecasts (RCP4.5, Fig 2B), and to 58.9% under pessimistic climate  
139 change scenarios (RCP8.5, Fig 2C). TFL-based models also predict that by 2070 the available  
140 habitat for *D. flavomontana* will have reduced by 42.3% and 62.9% under RCP4.5 and RCP8.5  
141 respectively.

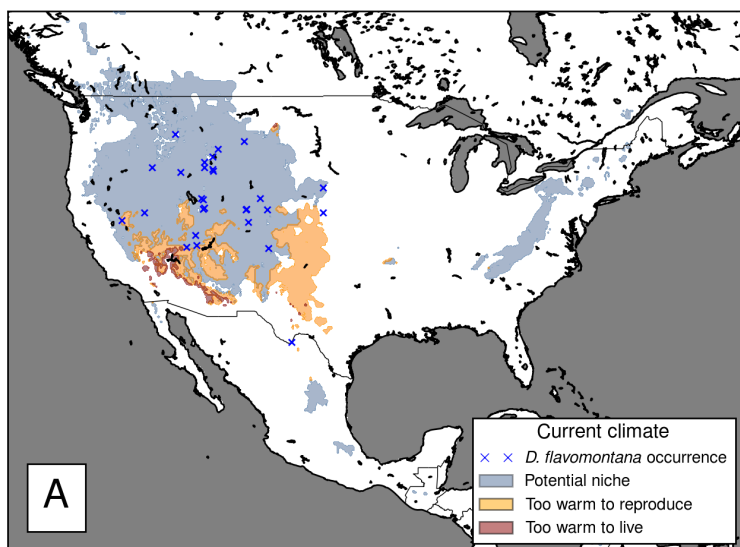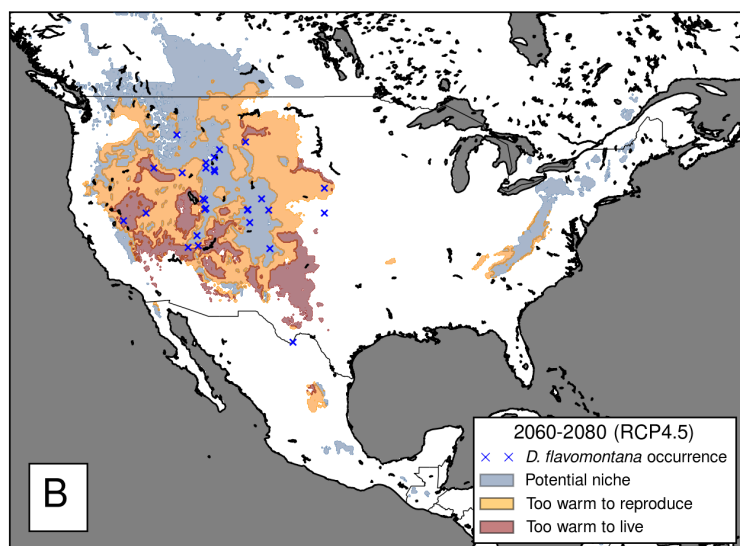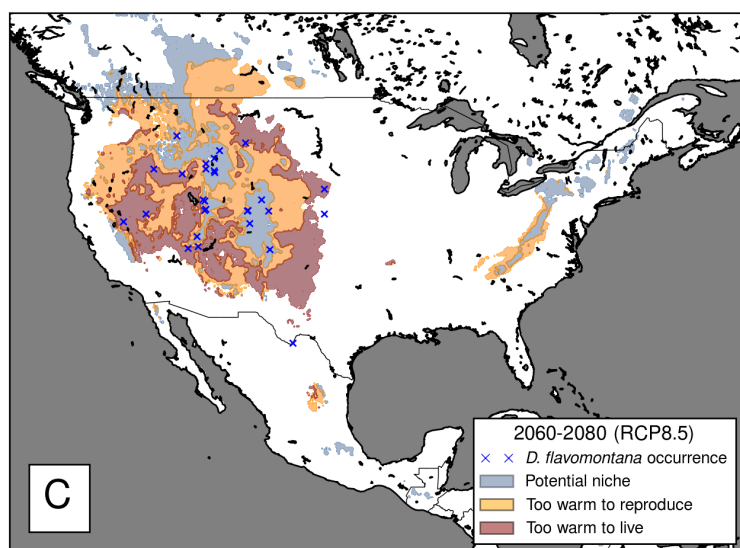

145 Figure 2: Potential habitat range of *Drosophila flavomontana* (LT80 = 35.8°C, TFL80 =  
146 31.4°C) under A) current and B & C) possible future climate scenarios (B = RCP4.5  
147 ‘moderately optimistic’, C = RCP8.5 ‘pessimistic’, predicted for 2060 - 2080). Colored areas  
148 in each panel represent suitable habitat range predicted by the model that excludes  
149 maximum temperature (Fig S5). Red areas show regions where maximum summer  
150 temperatures exceed LT80. Orange areas show regions where maximum summertime  
151 temperatures exceed TFL80. Blue regions are habitable for *D. flavomontana* all year.

152  
153 If our data for *Drosophila* can be extrapolated to other organisms, it is likely that male fertility  
154 losses at high temperatures are common and can occur at substantially lower temperatures  
155 than the species upper lethal limit. The limited data on fertility at extreme temperatures  
156 supports this, with losses in male fertility at high temperatures seen across a broad diversity of  
157 organisms(18). It is possible that behavioral thermoregulation will reduce the impact of high  
158 temperatures on fertility in nature. *Drosophila* are able to behaviorally thermoregulate, moving  
159 to leaf litter, shade, or higher altitudes, with many species able to survive high temperature  
160 periods by aestivating as adults, eggs or pupae(22). Despite this, we still find that the  
161 distribution of species is predicted by thermal fertility limits. Even species that might be  
162 predicted to have high thermal tolerance can show evidence of thermal fertility losses. For  
163 instance, the zebra finch, a high temperature adapted desert- dwelling endothermic species  
164 with naturally high body temperature and good thermoregulation, shows substantial damage  
165 to sperm at temperatures it regularly experiences in nature(15).

166

167 Our work suggests that temperature-driven fertility losses may be a major threat to biodiversity  
168 during climate change. We urgently need to understand the range of organisms likely to suffer  
169 similar fertility losses in nature, and the traits that predict vulnerability. However, we currently  
170 do not understand the physiology underlying variation in TFLs between species, nor the  
171 selective forces that created this variation. Ultimately, we need to know whether evolution for  
172 higher TFLs will allow species to adapt to a warming environment.

173 **References and Notes:**

- 174 1. G. T. Pecl *et al.*, Biodiversity redistribution under climate change: Impacts on  
175 ecosystems and human well-being. *Science*. **355**, eaai9214 (2017).
- 176 2. I.-C. Chen, J. K. Hill, R. Ohlemüller, D. B. Roy, C. D. Thomas, Rapid Range Shifts of  
177 Species Associated with High Levels of Climate Warming. *Science*. **333**, 1024–1026  
178 (2011).
- 179 3. J. M. Sunday *et al.*, Thermal-safety margins and the necessity of thermoregulatory  
180 behavior across latitude and elevation. *Proceedings of the National Academy of  
181 Sciences*. **111**, 5610–5615 (2014).
- 182 4. V. Kellermann *et al.*, Upper thermal limits of *Drosophila* are linked to species  
183 distributions and strongly constrained phylogenetically. *Proc. Natl. Acad. Sci. U.S.A.*  
184 **109**, 16228–16233 (2012).
- 185 5. M. Kearney, W. Porter, Mechanistic niche modelling: combining physiological and  
186 spatial data to predict species' ranges. *Ecol Lett*. **12**, 334–350 (2009).
- 187 6. J. Elith, J. R. Leathwick, Species Distribution Models: Ecological Explanation and  
188 Prediction Across Space and Time. *Annu. Rev. Ecol. Evol. Syst.* **40**, 677–697 (2009).
- 189 7. A. J. Nowakowski *et al.*, Thermal biology mediates responses of amphibians and  
190 reptiles to habitat modification. *Ecol Lett*. **21**, 345–355 (2018).

- 191 8. S. Metelmann *et al.*, The UK's suitability for *Aedes albopictus* in current and future  
192 climates. *Journal of The Royal Society Interface*. **16**, 20180761 (2019).
- 193 9. T. L. Sage *et al.*, The effect of high temperature stress on male and female  
194 reproduction in plants. *Field Crops Research*. **182**, 30–42 (2015).
- 195 10. K. Sales *et al.*, Experimental heatwaves compromise sperm function and cause  
196 transgenerational damage in a model insect. *Nat Commun*. **9**, 4771 (2018).
- 197 11. D. Porcelli, K. J. Gaston, R. K. Butlin, R. R. Snook, Local adaptation of reproductive  
198 performance during thermal stress. *J Evol Biol*. **30**, 422–429 (2016).
- 199 12. A. D. Saxon, E. K. O'Brien, J. R. Bridle, Temperature fluctuations during  
200 development reduce male fitness and may limit adaptive potential in tropical  
201 rainforest *Drosophila*. *J Evol Biol*. **31**, 405–415 (2018).
- 202 13. R. D. Breckels, B. D. Neff, The effects of elevated temperature on the sexual traits,  
203 immunology and survivorship of a tropical ectotherm. *Journal of Experimental*  
204 *Biology*. **216**, 2658–2664 (2013).
- 205 14. C. W. Paxton, M. V. B. Baria, V. M. Weis, S. Harii, Effect of elevated temperature on  
206 fecundity and reproductive timing in the coral *Acropora digitifera*. *Zygote*. **24**, 511–  
207 516 (2016).

- 208 15. L. L. Hurley, C. S. McDiarmid, C. R. Friesen, S. C. Griffith, M. Rowe, Experimental  
209 heatwaves negatively impact sperm quality in the zebra finch. *Proc. R. Soc. B.* **285**,  
210 20172547 (2018).
- 211 16. L. Yogev *et al.*, Seasonal variations in pre- and post-thaw donor sperm quality. *Hum*  
212 *Repro.* **19**, 880–885 (2004).
- 213 17. C. Rohmer, J. R. David, B. Moreteau, D. Joly, Heat induced male sterility in  
214 *Drosophila melanogaster*: Adaptive genetic variations among geographic  
215 populations and role of the Y chromosome. *Journal of Experimental Biology.* **207**,  
216 2735–2743 (2004).
- 217 18. B. S. Walsh *et al.*, The Impact of Climate Change on Fertility. *Trends Ecol. Evol.* **34**,  
218 249–259 (2019).
- 219 19. Materials and Methods
- 220 20. K. van der Linde, G. J. Steck, K. Hibbard, J. B. Florida, First records of *Zaprionus*  
221 *indianus* (Diptera: Drosophilidae), a pest species on commercial fruits from Panama  
222 and the United States of America. *BioOne* **89**, 402 - 404 (2006).
- 223 21. C. A. Deutsch *et al.*, Impacts of climate warming on terrestrial ectotherms across  
224 latitude. *Proceedings of the National Academy of Sciences.* **105**, 6668–6672 (2008).
- 225 22. M. E. Dillon, G. Wang, P. A. Garrity, R. B. Huey, Thermal preference in *Drosophila*.  
226 *Journal of Thermal Biology.* **34**, 109–119 (2009).

- 227 23. J. Overgaard, M. R. Kearney, A. A. Hoffmann, Sensitivity to thermal extremes in  
228 Australian *Drosophila* implies similar impacts of climate change on the distribution  
229 of widespread and tropical species. *Global Change Biology*. **20**, 1738–1750 (2014).
- 230 24. J. S. Terblanche, J. A. Deere, S. Clusella Trullas, C. Janion, S. L. Chown, Critical  
231 thermal limits depend on methodological context. *Proc. R. Soc. B*. **274**, 2935–2942  
232 (2007).
- 233 25. P. T. Rohner *et al.*, Interrelations of global macroecological patterns in wing and  
234 thorax size, sexual size dimorphism, and range size of the *Drosophilidae*.  
235 *Ecography*. **41**, 1707–1717 (2018).
- 236 26. S. E. Fick, R. J. Hijmans, WorldClim 2: new 1-km spatial resolution climate surfaces  
237 for global land areas. *International Journal of Climatology*. **37**, 4302–4315 (2017).
- 238 27. S. J. Phillips, R. P. Anderson, R. E. Schapire, Maximum entropy modeling of species  
239 geographic distributions. *Ecological Modelling*. **190**, 231–259 (2006).
- 240 28. N. Ramankutty, A. T. Evan, C. Monfreda, J. A. Foley, Geographic distribution of  
241 global agricultural lands in the year 2000, *Global Biogeochemical Cycles*, **22**  
242 doi:10.1029/2007GB002952, (2008).
- 243 29. C. Amante, B. W. Eakins, ETOPO1 1 Arc-Minute Global Relief Model: Procedures,  
244 Data Source and Analysis. *National Geographic Data Center* (2009).



- 245 30. C. Liu, M. White, G. Newell, Selecting thresholds for the prediction of species  
246 occurrence with presence-only data. *Journal of Biogeography*. **40**, 778–789 (2013).
- 247 31. B. Thrasher, E. P. Maurer, C. McKellar, P. B. Duffy, Technical Note: Bias correcting  
248 climate model simulated daily temperature extremes with quantile mapping.  
249 *Hydrol. Earth Syst. Sci.* **16**, 3309–3314 (2012).
- 250 32. A. E. Jones *et al.*, Bluetongue risk under future climates. *Nature Climate Change*. **9**,  
251 153–157 (2019).
- 252 33. S. Pitnick, T. A. Markow, G. S. Spicer, Delayed male maturity is a cost of producing  
253 large sperm in *Drosophila*. *Proceedings of the National Academy of Sciences*. **92**,  
254 10614–10618 (1995).
- 255 34. K. E. Roberts, J. D. Hadfield, M. D. Sharma, B. Longdon, Changes in temperature  
256 alter the potential outcomes of virus host shifts. *PLoS pathogens*. **14**, e1007185  
257 (2018).
- 258 35. M. D. Garlovsky, R. R. Snook, Persistent postmating, prezygotic reproductive  
259 isolation between populations. *Ecol Evol*. **8**, 9062–9073 (2018).
- 260 36. A. A. Hoffmann, S. L. Chown, S. Clusella Trullas, Upper thermal limits in terrestrial  
261 ectotherms: how constrained are they? *Funct Ecol*. **27**, 934–949 (2013).

262 **Acknowledgements:** Natasha Mannion and Dr Angela Sims for assistance with experiments, Dr  
263 Ben Longdon and Dr Katherine Roberts for flies, Rowan Connell for designing 3D-printed  
264 equipment. **Funding:** NERC grant NE/P002692/1 to TP, AB, AH & RS. SNF P300PA\_177830 to  
265 AM. NIHR HPRU EZI to SM. **Author Contributions:** Conception: TP, AB, RS, AH, SP. Methodology  
266 & data collection: SP, BW, NW. Data curation: SP & SM. Analysis: SP, AM & SM. Original Draft:  
267 SP, TP, AB, RS & AH. Review & Editing: All authors. **Data and materials availability:** All data and  
268 analysis R code will be deposited on Dryad upon acceptance of this manuscript.

269

270

271 **List of Supplementary Materials:**

272 Materials and Methods

273 Figures S1-S5

274 Tables S1-S4

275 Supplementary Text

276 References (23 - 36)

277 **Materials and Methods:**

278 Animal maintenance:

279 All species were kept in temperature-controlled rooms at their noted “rearing temperature”

280 (see table S4) selected based on observations of when the laboratory populations were most

281 stable. All stocks were kept at 12:12 L:D and ambient humidity. Stocks were maintained at

282 moderate density (20 – 50 flies per 23ml vial or 50 – 100 flies per 300ml bottle culture).

283 Cultures were tipped to fresh food every 7 days and a new generation was made every 4 – 6

284 weeks depending on the speed of a species development. Species were reared on one of four

285 food types; A = ASG (10g agar, 85g Sucrose, 20g yeast extract, 60g maize, 1000ml H<sub>2</sub>O, 25ml

286 10% Nipagin), B = Banana (10g agar, 30g Yeast extract, 150g pulped banana, 50g Molasses, 30g

287 Malt Extract, 25ml 10% Nipagin, 1000ml H<sub>2</sub>O), P = Propionic (10g Agar, 20g Yeast extract, 70g

288 cornmeal, 10g soya flour, 80g Malt Extract, 22g Molasses, 14ml 10% nipagin, 6ml Propionic

289 acid, 1000ml H<sub>2</sub>O), M = Malt (10g agar, 20g Yeast, 60g Semolina, 80g Malt, 14ml 10% Nipagin,

290 5ml Propionic acid, 1000ml H<sub>2</sub>O). To standardize across species, we only included males in our

291 TFL assay that were sexually mature. This inevitably led to variation in the age of males (days

292 since eclosion) between species based on published age-to-maturity (e.g. 34) and our own

293 observations (Table S4 for details).

294 Species verification:

295 Most *Drosophila* species were gained from stock centers, other research groups, or through  
296 field collections. Where species were not distinguishable through evident morphological traits,  
297 we verified position within the phylogeny by nucleotide sequence identity.

298  
299 We extracted DNA from 2-3 adult male flies with DNeasy kits (Qiagen) following the  
300 manufacturer's invertebrate protocol. We PCR amplified a portion of the mitochondrial  
301 universal barcode gene cytochrome oxidase subunit 1 using the primers C1-J-1718 (5' –  
302 GGAGGATTTGGAAATTGATTAGT – 3') and C1-N-2191 (5' – CCCGGTAAAATTAATATAAACTTC –  
303 3') using HotStart Taq (Promega) with (5-minute initial heating, 30 cycles at 95°C for 30s, 56 for  
304 30s, and 72°C for 30, with an final elongation step of 72°C for 120s). PCR products were  
305 visualized by SYBRSafe-stained gel electrophoresis and cleaned up using Exonuclease I and  
306 Shrimp Alkaline Phosphatase incubation per supplier protocol (BioLine). We then used BigDye  
307 based sequence reactions with both forward and reverse primers, followed by NaOH & ethanol  
308 precipitation clean-up and precipitation before sequences were analyzed with an ABI 3500XL  
309 Genetic Analyzer. Forward and reverse sequences for each species were aligned to derive a  
310 consensus sequence. For species with a putative ID based on stock center or collaborator  
311 expertise we assessed the clustering of these sequences with publicly available CO1 sequences  
312 from the same species available on the BOLD database ([boldsystems.org](http://boldsystems.org)). Clustering was  
313 performed with the MAFFT server tool, and clustering via a neighbor-joining tree was  
314 visualized, all based on default parameters. For species that were unknown (two *repleta*-like  
315 species collected from the field in Madeira and Morocco), we performed the same process as

316 above, but included multiple sequences from multiple species in the *repleta* species group –  
317 initial BLAST of these sequences on the NCBI database had given an approximate idea of the  
318 species ID.

319

### 320 Measuring upper thermal limits

321 We assayed three metrics of upper thermal limits in males from 43 species of *Drosophila*: Lethal  
322 Temperature 80% (LT80), Thermal Fertility Limit 80% (TFL80) and Maximum Critical  
323 Temperature (CTmax). We chose to test for thermal fertility limits in only males because of the  
324 substantial evidence that male fertility is particularly vulnerable to high temperatures(18).

325

326 *LT80 & TFL80*: Newly eclosed virgin adult males were collected over a 48-hour period into  
327 *Drosophila* vials and allowed to sexually mature for 7 – 21 days depending on species (see Table  
328 S4). Males were kept in groups of maximum 10 individuals to minimize intrasexual aggression.  
329 Once mature, males were transferred to fresh 23ml fly vials with standard maize-sugar-yeast  
330 agar “ASG” medium’ food and allocated to 3D-printed floating plastic racks in pre-heated  
331 waterbaths (Grant TXF200) set to a range of temperatures (see Table S4 for temperature  
332 ranges). ASG food was used during heating for all species because preliminary work had shown  
333 that survival under heat stress was influenced by food type. Floating racks were weighted with  
334 ball-bearings at each corner to keep vials containing flies submerged so that the waterline was  
335 above the cotton-wool stopper. This ensured that flies were exposed to homogenous  
336 temperature conditions inside the vials. In each run of the experiment we monitored the  
337 temperature inside a fresh ASG vial without flies with a k-type thermocouple attached to a data

338 logger (Pico Technology TC-08). Males were heated for 4 hours between ~10am - ~2pm and  
339 then returned to temperature-controlled rooms set to the species' benign temperature. We  
340 scored the survival of males the next morning to account for any immediate recovery or  
341 delayed lethality of the temperature treatment. We scored flies as dead if they were  
342 completely immobile or had become stuck on their backs in the fly food – the latter would  
343 indicate that the flies were completely incapacitated by the treatment temperature which  
344 would likely be lethal in the wild.

345 Surviving males were then individually aspirated into separate, fresh vials containing their  
346 species' designated food type and 3-4 sexually mature virgin females. Males remained in these  
347 vials at their benign temperature and allowed to mate freely for 6 days. This allows us to score  
348 any immediate lasting effect of temperature on fertility. After 6 days males were transferred to  
349 a second fresh vial with 1-2 more virgin females and allowed to mate for 24 hours. This allowed  
350 us to test for recovery of fertility or any delayed sterilizing effect of temperature. Females in  
351 both sets of vials were left to lay eggs for 3-5 days (depending on fecundity of the species) after  
352 the male had been removed. Fertility was scored qualitatively as the presence or absence of  
353 any offspring: vials were routinely scored for the presence of larval flies by checking for the  
354 larvae themselves or their distinctive track marks in the food. Juveniles flies were allowed to  
355 develop through to adult eclosion before being frozen and the number of adult offspring  
356 counted.

357 In total, 14742 males were exposed to heat treatment, of which 10925 survived and 9064 went  
358 on to be tested for heat-induced sterility. The average sample size at each temperature per  
359 species was  $36.5 \pm 0.5\text{sem}$ , ranging from 10 – 88 individuals.

360  
361 *CTmax*: The measures of upper tolerance described above are performed under static heat-  
362 stress conditions – this is necessary for estimating TFLs because the phenotype “fertility” can  
363 only be observed after the heat-stress treatment, so matching a male’s fertility to a stress  
364 temperature requires that he only experiences a single stressful environment. LT80 is therefore  
365 a directly comparable measure to TFL80. However, several studies in *Drosophila* and other  
366 animals have used estimates of temperature tolerance measured under gradually ramping heat  
367 conditions to estimate species response to climate change (4, 7, 23, 24). Because of this, and  
368 because previous work has shown that estimate of upper critical thermal limits can depend on  
369 methodological context(25), we also measured upper critical limits of our 43 *Drosophila* species  
370 under ramping heat conditions – critical thermal maxima (CTmax). This allows us to compare  
371 how static and dynamic measures of critical heat tolerance predict species’ distributions. It also  
372 allows us to compare upper TFLs to two widely used measures of upper critical limits.

373  
374 We measure CTmax as the mean temperature at which male flies lose coordinated movement  
375 and are unable to right themselves. Individual males were collected as virgin adults from fly  
376 stocks and allowed to sexually mature (see Table S4). Flies were then anesthetized with CO<sub>2</sub>  
377 and isolated into individual glass sample tubes sealed with a rubber stopper. Sample tubes  
378 were left at ambient room temperature for at least 30 minutes to allow males to fully recover  
379 from CO<sub>2</sub> anesthetization – preliminary trials found no difference in CTmax between  
380 anesthetized and non-anesthetized male *D. melanogaster*. Sample tubes then were attached to  
381 a custom-built plastic rack and held at a 45° angle with elastic banding to facilitate the

382 experimenter identifying when flies collapsed. The rack and vials were submerged in a glass  
383 aquarium held at the rearing temperature for the given species by a water circulator (Grant  
384 TXF200) (18, 23 or 25°C – Table S4). The temperature was then increased at a rate of 0.1°C per  
385 minute until all flies were incapacitated. The temperature at which flies collapsed for 30  
386 seconds and did not right themselves after being physically disturbed by the experimenter  
387 (tapping the vial) was scored. The temperature of the waterbath was continuously recorded  
388 throughout the assay with a data logger (Elitech RC-61). The mean sample size for each species  
389 for CTmax assays was  $19.53 \pm 1.77$ .

390

#### 391 Repeatability

392 Due to the logistical constraints in the number of flies that could be processed at a time and the  
393 differences in temperature range required to stress each species it was impossible to assay  
394 upper limits across all 43 species simultaneously. Further, inter-species variation in  
395 development time prohibited us from synchronizing all 43 species to run the assay in a  
396 completely randomized block design. Instead, we assayed each species separately to  
397 independently estimate CTmax, TFL80 and LT80. These assays were run between June 2018 –  
398 November 2019.

399

400 To test the repeatability of our measure of Lethal Temperature (LT80) we ran a single control  
401 block in February 2020 with 22 species that we could obtain enough virgin males that would  
402 reach sexual maturity in synchrony. We simultaneously exposed these species to a range of 6  
403 temperatures each that covered their estimated LT80 identified when we had previously run



404 them individually. We then tested the strength of the correlation between our original LT80  
405 estimates and those given by this replicate block and determined if any given species showed  
406 significantly different estimates based on whether the confidence intervals of the two runs  
407 overlapped. Sample sizes for this control run ranged from 3 – 10 males per temperature per  
408 species, and involved 1152 male flies in total.

409  
410 As a test of repeatability for our TFL80 estimates we ran two independent TFL assays on  
411 *Drosophila virilis*. This species was selected because it had demonstrated a clear difference  
412 between TFL80 and LT80 limits. The two repeat blocks were run 6 months apart and data were  
413 collected by two separate researchers. We compare the estimated TFL80 from these  
414 independent runs and consider differences to be significant if the 95% confidence intervals of  
415 our estimates do not overlap.

416  
417 Repeatability of CTmax was estimated by randomly allocating species from the same rearing  
418 temperatures into blocks of 3 - 5 species and measuring their mean CTmax as described above.  
419 We compared these mean Ctmax values with those obtained when species were run  
420 individually when we collected the CTmax data used in analyses.

421  
422 Point estimates of TFL80 & LT80

423 We chose 80% thresholds as our physiological limits for both LT and TFL because i) we wanted  
424 to compare viability and fertility measures on comparable scales, and ii) a loss of 80% of males  
425 is likely to represent a substantial threat to population stability for most species.

426

427 We found that general linear models fit our qualitative (1/0 data) fertility and survival data  
428 poorly, and overestimated 80% fertility loss thresholds considerably. Instead, we generated  
429 point estimates of 80% thresholds with dose response models (`drm()`), implemented in the  
430 `drc` package in R. We used 3-parameter versions of the log-logistic model which fixes the  
431 lower limit of the predicted curve to 0 to reflect that we expect fertility and survival to  
432 eventually reach 0 over an infinite range of temperatures. The models then estimate the point  
433 at which we see an 80% reduction in survival or fertility relative to the upper limit present in  
434 the data. In this way, these models allow for a given species to inherently have some degree of  
435 sterility even at benign temperatures, and to estimate the temperature required to reduce this  
436 by 80%. Percentage fertility was analyzed for surviving flies only, i.e males killed by the heat  
437 treatment were not considered to be sterile.

438

439 In analyses in which we predict geographic range by physiological limits we use TFL80 estimates  
440 that are 'significantly' lower than the species' LT80 estimate – for the remaining species TFL80  
441 point estimates are defaulted to the LT80 to be conservative. We considered the difference  
442 between TFL80 and LT80 to be 'significant' if the 95% confidence intervals of the two point-  
443 estimates do not overlap.

444

#### 445 Correlations between upper thermal limits.

446 We used phylogenetically controlled linear models to test how much variation in TFL80 is  
447 explained by variation in LT80. These measures are taken from the same assays and are often

448 very similar, so this correlation gives a quantitative assessment of the mismatch between these  
449 two thermal tolerance traits.

450  
451 CTmax and LT80 inherently use different heating regimes to capture upper critical limits. Most  
452 notably, CTmax includes an element of temperature ramping, and so may allow species to  
453 plastically harden to high temperature stress. To test how well these two measures capture the  
454 same component of thermal interspecific variation, and are therefore proxies for each other,  
455 we used phylogenetically controlled linear models to explore the correlation between TFL80  
456 and CTmax. Whilst we did not expect these methods to produce identical point estimates of  
457 lethal temperatures for a given species, we did hypothesize that these correlations will have a  
458 high  $R^2$  and a slope estimate close to 1.

459  
460 If there is a universal upper limit to fertility across *Drosophila* then we would expect the  
461 difference between TFL and critical temperatures to be greater in species with higher  
462 temperature LT80 and CTmax. To test this, we used phylogenetically controlled linear models to  
463 test for significant correlations between  $\Delta$ Limits (the difference between TFL80 and LT80) and  
464 both LT80 and CTmax.

465  
466 Accounting for phylogeny:

467 All of the species we used in this study are present in a phylogeny published by Patrik Röhner  
468 and colleagues(26): We use this phylogenetic tree as the basis of all our phylogenetically  
469 controlled analyses.

470

471 We tested for phylogenetic signal in all three upper thermal limits (LT80, TFL80 and CTmax). We  
472 used ``pgls()`` in ``caper`` to estimate if Pagel's lambda was significantly different from 0 (no  
473 phylogenetic signal) or 1 (complete Brownian motion). The maximum likelihood method was  
474 used to estimate lambda.

475

476 When analyzing correlations among traits, and between traits and geographic distributions we  
477 corrected for phylogenetic signal in model residuals with ``pgls()`` in the R package ``caper``. Even  
478 where phylogenetic signal was estimated to be not significantly different to 0, we retained the  
479 correction in the model because these models give qualitatively identical results to uncorrected  
480 linear models using ``lm()``.

481

#### 482 Environmental variables:

483 Geographic distribution data for each species were obtained manually from TaxoDros.uzh.ch as  
484 coordinates and location names. These were systematically cleaned by deleting any entry set to  
485 zero decimal places in both coordinates. Then, they were globally cleaned by removing  
486 locations with vague names such as entire countries or US states. Plots of each species location  
487 on a map were then visually inspected, and outliers were investigated and removed or  
488 corrected when appropriate.

489

490 The cleaned dataset of geolocations was then integrated with rasterized bioclimate data from  
491 the WorldClim V2.0 database (27). Our intention was not to fully reassess multiple climate

492 variables as predictors for *Drosophila* distributions, because this has received extensive  
493 attention in the existing literature(4, 24). Instead, we tested if TFLs correlate with variables  
494 previously identified as important for predicting physiological limits and distribution in  
495 *Drosophila*; the maximum temperature reached in the hottest summer month (WorldClim Bio5)  
496 and annual precipitation (WorldClim Bio12). Means of each climate variable for each species  
497 were calculated across all global locations. We also calculated the mean of each variable  
498 independently for locations in the North and South hemispheres for species whose range  
499 straddles the equator.

500

#### 501 Comparing upper thermal limits as predictors of species' thermal environment

502 We used three distinct modelling approaches to test which measure of upper thermal limits  
503 best predicts species' thermal range:

504

505 Firstly, we fitted separate phylogenetically controlled linear models with either TFL80, LT80 or  
506 CTmax as independent predictors, and species' Tmax (WorldClim Bio5) as a response variable.  
507 In all three models we included mean annual precipitation (WorldClim Bio12 or "Pann") as an  
508 interacting covariate, because previous work has found that the power of CTmax to predict  
509 species' thermal environments degrades in more humid habitats(4). In these models all  
510 predictors are centered and scaled. We then used AIC-based model selection to reduce models  
511 to minimum-adequate models, and compared the slope estimate, model structure and R<sup>2</sup> of the  
512 competing models.

513

514 Secondly, we directly replicated the method of (4) in which the authors split species into those  
515 that experience greater-than and less-than 1000mm of rainfall (“wet” and “dry” hereafter). The  
516 authors of (4) found that CTmax correlated well for “dry” species but not for “wet” species. We  
517 ran phylogenetically corrected linear models with Tmax as a response and either CTmax, LT80  
518 or TFL80 and predictors for both ‘dry’ and ‘wet’ species. We qualitatively compared the R<sup>2</sup> of  
519 these models as indicators of model fit.

520  
521 Finally, we included both CTmax and TFL80 and their interaction with `Pann` into a single  
522 phylogenetically controlled model of Tmax. We did not include LT80 in this analysis because *a*  
523 *priori* Variance Inflation Factor tests (VIF) on non-phylogenetically controlled versions of this  
524 model indicated that LT80 correlated very strongly with both other measures. We reduced the  
525 maximal model through AIC-based stepwise simplification starting with higher order interaction  
526 terms to reach a minimum adequate model.

527  
528 Calculating and modelling thermal safety margins  
529 Thermal safety margins were calculated as the difference between a species’ physiological  
530 upper thermal limit and the mean maximum summertime temperature they are likely to  
531 experience across all of their known global distribution locations. As per(4), we calculated this  
532 in two ways: firstly by taking the mean Tmax for each species, to estimate safety margins for  
533 the ‘central’ populations of a species (termed “Central Safety Margin”). Secondly by taking the  
534 mean Tmax + 1 SD to account for populations of species that live at the upper thermal range of

535 species' distribution (the "distribution safety margin). Safety margins were calculated  
536 separately using either CTmax, TFL80 or LT80 as the physiological limit.

537  
538 We also treated populations in the North and Southern hemispheres as equivalent to separate  
539 species, because previous work has found minor differences in safety margins in the North and  
540 South hemisphere, likely because of biases in sampling efforts(3).

541  
542 Safety margins were modelled as phylogenetically controlled linear mixed models with  
543 'hemisphere' (N or S) and 'physiological limit' (CTmax, TFL80 or LT80) as linear predictors,  
544 absolute latitude (degrees<sup>2</sup>) as a quadratic predictor, and species identity as a random  
545 intercept.

546

#### 547 Predicting current and putative future distributions of *D. flavomontana*

548 As a case-study demonstration of the importance of TFLs, we use MaxEnt v3.4.1 (28) to model  
549 potential distributions of *D. flavomontana*. Occurrence data were obtained from  
550 TaxoDros.uzh.ch and points within 25km of each other were clustered together to avoid  
551 oversampling ( $N = 24$ ). First, we chose climatic and other variables to predict a potential  
552 distribution of *D. flavomontana* that is independent of the upper thermal limit. After excluding  
553 variables that strongly correlated or had little to no impact on the model results (<3%  
554 contribution), we used four of the tested 15 variables: mean winter temperature (WC Bio 11,  
555 from the WorldClim2.0 database, precipitation seasonality (WC Bio 15), an agricultural index  
556 (29), and elevation (30). We then ran 10 cross-validations with maximum iterations of 5000,

557 using 10000 random pseudo-absences. To distinguish suitable from unsuitable regions, we used  
558 the threshold that maximized Youden's index (maximum training sensitivity plus specificity)  
559 (31). The MaxEnt mean output grid is shown in Figure S5.

560

561 We then constrained the suitable area by the upper physiological thermal limits measured  
562 above: i) the lethal temperature measured as LT80 (35.8°C), and ii) the TFL80 (31.4°C). We use  
563 the maximum weekly temperature of the warmest month as reference (WC Bio5). Using WC Bio  
564 05 directly as a predictor variable for *D. flavomontana* had close to no effect on the distribution  
565 (0.1% contribution).

566

567 For future predictions, we chose two carbon emission scenarios: RCP4.5 (moderately optimistic)  
568 and RCP8.5 (pessimistic). We use precipitation and temperature predictions of the NorESM1-M  
569 model from the NEX-NASA GDDP data set (32), as this model produces a median trend in terms  
570 of temperature increase(33). The agricultural index and elevation had to be used as present day  
571 data. Predicting and constraining the possible future distribution followed the same procedure  
572 as for the current distribution.

573



574

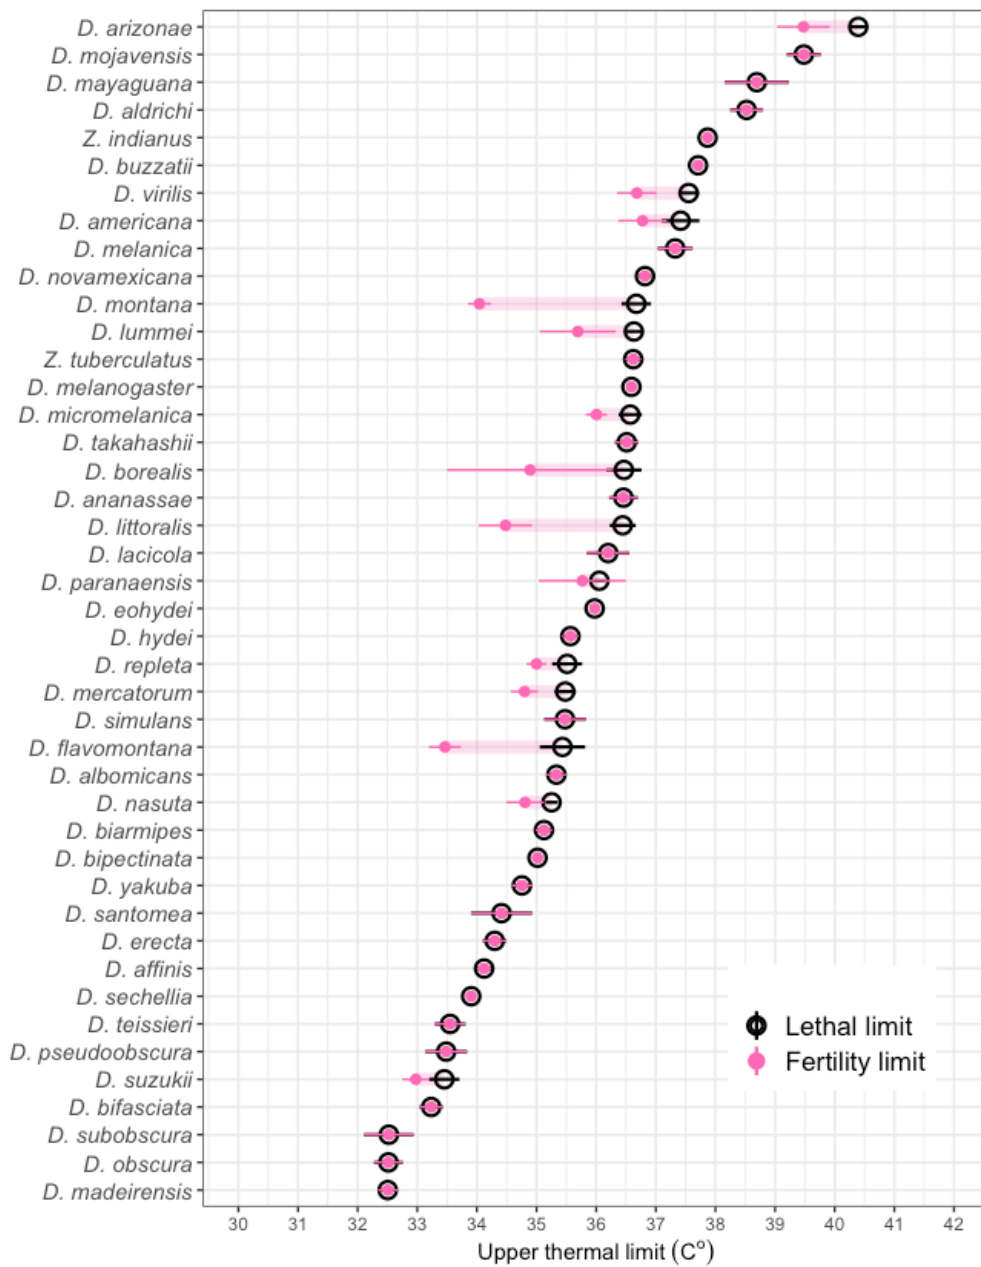

575

576

577

578

579

580

**Figure S1: TFL80 and LT80 of *Drosophila* immediately after heat stress.** Several species of *Drosophila* lose 80% fertility at cooler-than-lethal temperatures immediately following heat-shock. LT80 (black circles) and TFL80 (pink circles). Errors for both measures are 95% confidence intervals generated from dose response model estimates. Fertility loss measured as ability to sire any offspring between 1 – 6 days post heat-stress.

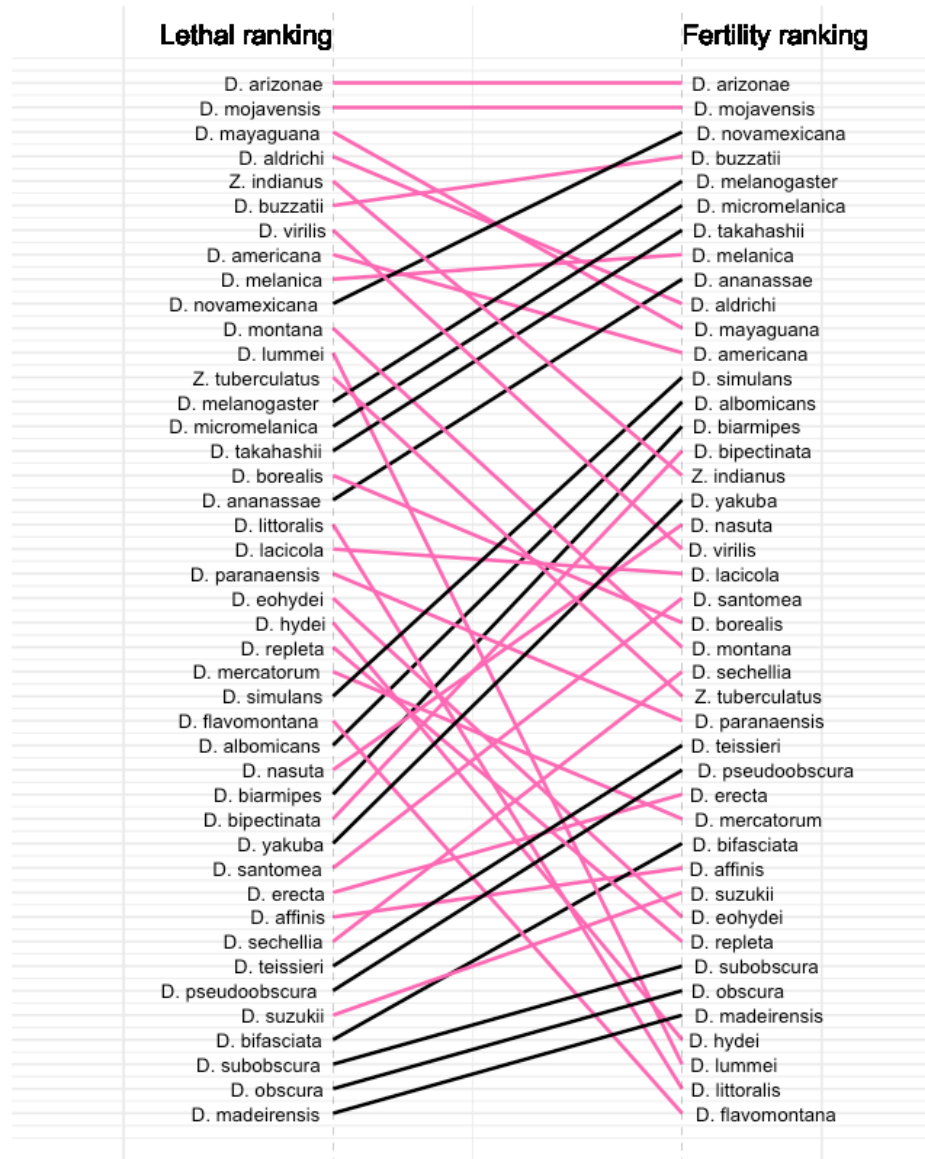

581  
582 **Fig S2: Relative ranking of species thermal robustness based on LT80 and TFL80.** Most to least  
583 heat tolerant species ranked from top to bottom. Pink bars indicate species with significantly  
584 lower TFL than LT. Data based on TFL80 recorded 7-days post-heat shock.

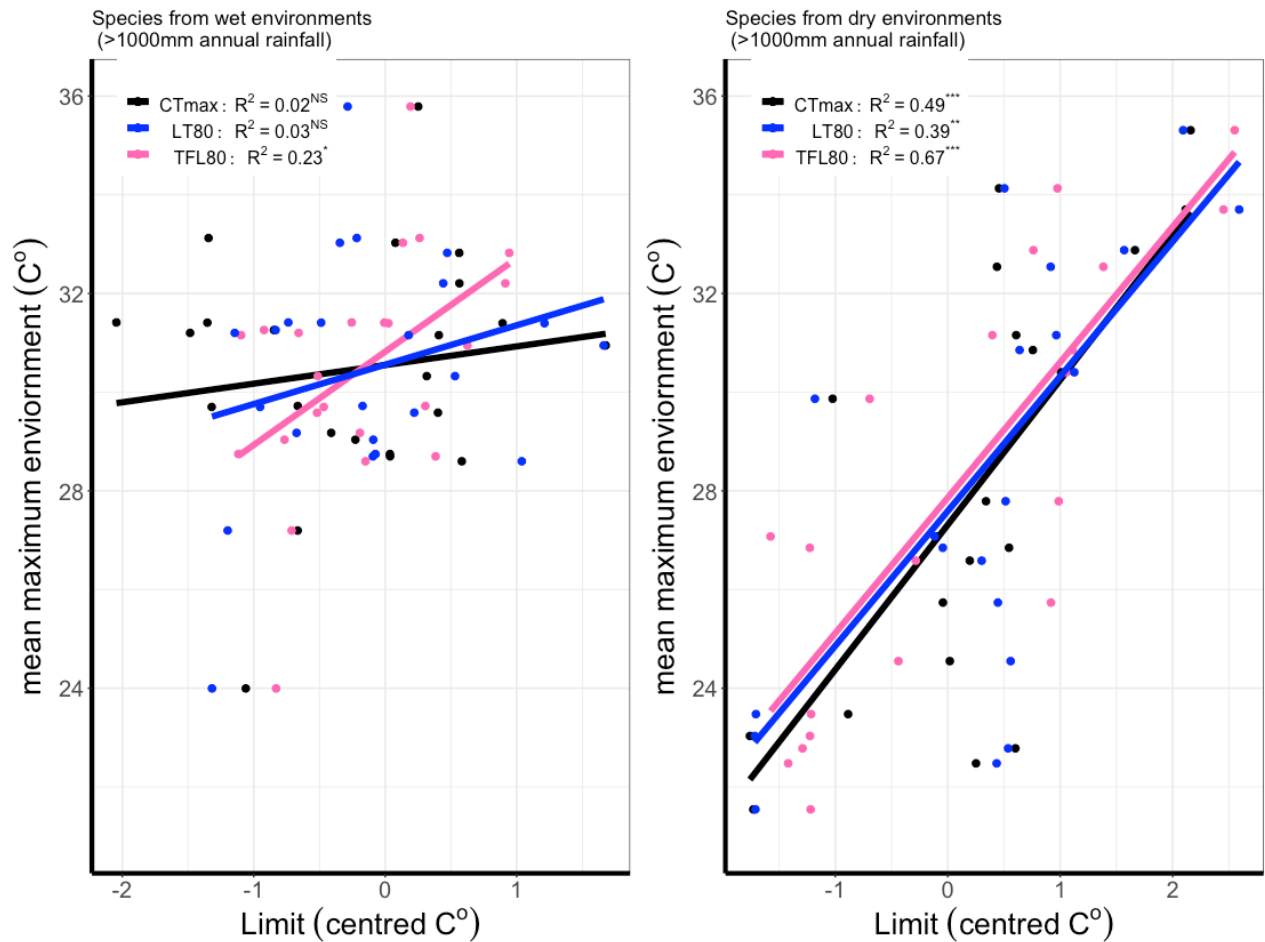

585  
586 **Fig S3. Correlations of maximum environmental temperature with CTmax, LT80 and TFL80.**  
587 Upper thermal limits to fertility better predicts species' natural thermal habitat than either  
588 measure of critical limits; LT80 includes the same heat stress regime as TFL80, CTmax is widely  
589 used. To aid visualization here, data are split into 'wet' (>1000ml rainfall year<sup>-1</sup>) and 'dry' (< 1000  
590 ml rainfall year<sup>-1</sup>) habitats as in(4). Model estimates from fitted lines here given in Table S2.  
591 Measures based solely on upper critical limits show no significant correlation for species that live  
592 in naturally wet habitat. This recapitulates the findings of Kellermann *et al*(4).

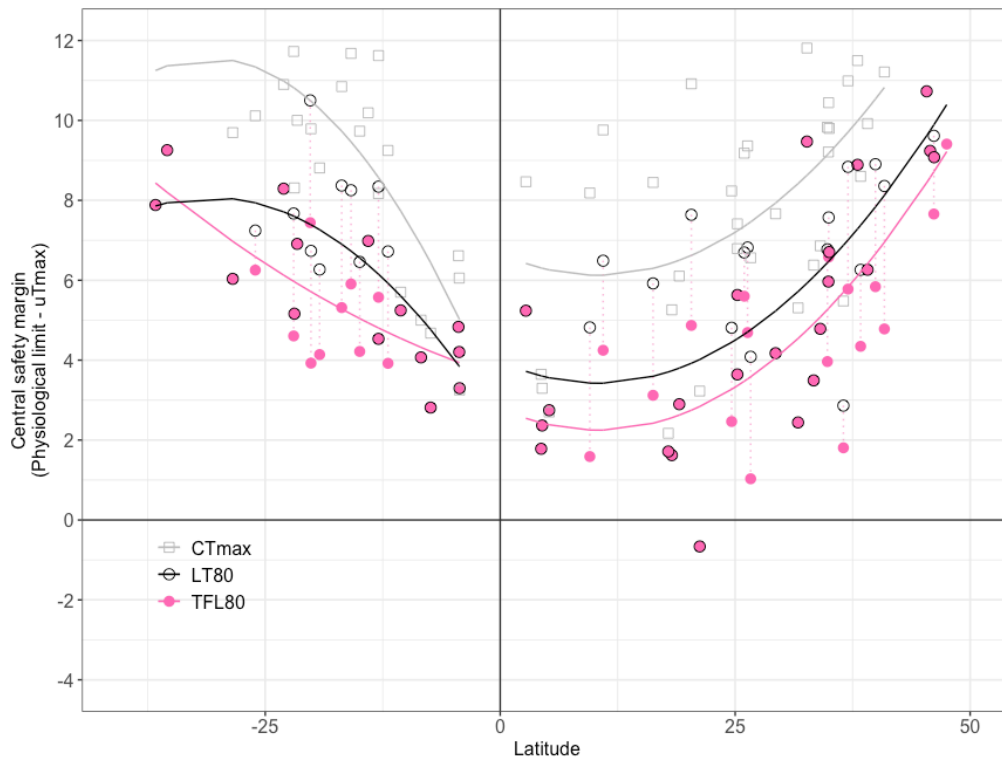

593

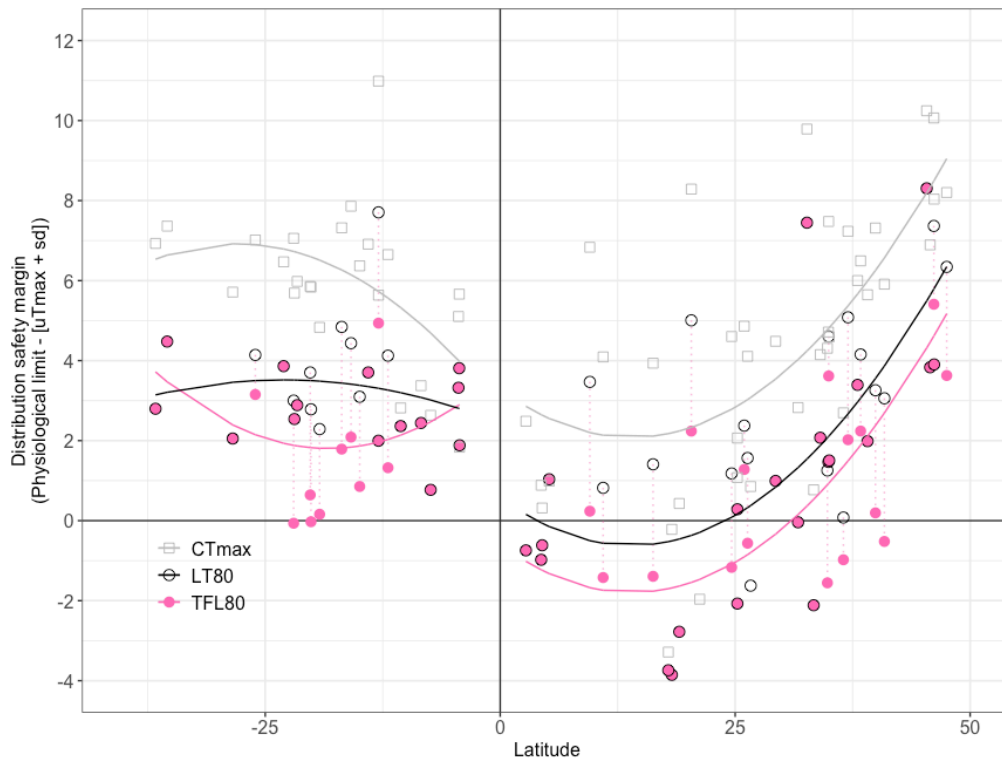

594

595 **Fig S4: Thermal safety margins.** Central (top) and Distribution (bottom) safety margins for  
596 species calculated using the physiological limit minus the mean maximum temperature across all  
597 recorded locations for each species. For distribution margins  $T_{max} + 1sd$  is used to calculate  
598 safety margins, which has been argued captures populations at the boundary of a species'  
599 thermal range (4). Grey points and fit are safety margins calculated using knockdown CTmax

600 values. Black points and lines are safety margins based on LT80, and pink points are margins  
601 based on TFL80. Fitted lines are predictions from models in which the limit type (TFL, LT or  
602 CTmax) and latitude<sup>2</sup> are fixed effects and species identity is a random effect to account for  
603 repeated measures across species. Models and fits for North and South populations are  
604 calculated independently. Based on CTmax we predict that safety margins for central populations  
605 are  $9.06 \pm 3.24^{\circ}\text{C}$  and populations at the thermal extremes have margins of  $5.23 \pm 3.24^{\circ}\text{C}$ . This  
606 suggests that 3 species have populations at the edge of their range that are currently exposed to  
607 lethal temperatures in the hottest part of the year. LT80 is a more severe heat shock than CTmax  
608 and so inherently predicts smaller margins;  $6.36 \pm 2.92^{\circ}\text{C}$  for central populations and  $2.59 \pm$   
609  $3.08^{\circ}\text{C}$  for populations at thermal extremes of species' ranges. This physiological measure  
610 predicts that 11 species have populations at the edge of their range that are currently exposed to  
611 lethal temperatures in the hottest part of the year. Including fertility data into LT80 to get TFL80  
612 predicts that populations at the center of species' ranges have a  $5.26 \pm 2.55^{\circ}\text{C}$  safety margin,  
613 whilst populations at the edge of species' thermal ranges have a  $1.43 \pm 2.8^{\circ}\text{C}$  safety margin. TFL-  
614 based margins predict that 20 species have populations at the edge of their thermal range that  
615 are currently exposed to sterilizing temperatures in the hottest part of the year. Safety margins  
616 calculated with TFL80 are significantly smaller than those calculated from LT80 (Central safety  
617 margins: lmer:  $F_1 = 28.04$ ,  $P < 0.001$ , estimate = -1.13, distribution safety margins; lmer:  $F_1 =$   
618  $17.33$ ,  $P < 0.001$ , estimate = -1.13). We did not statistically compare safety margins calculated  
619 from CTmax with those calculated from TFL80 and LT80 because CTmax inherently uses a  
620 different method of heating individuals.

621

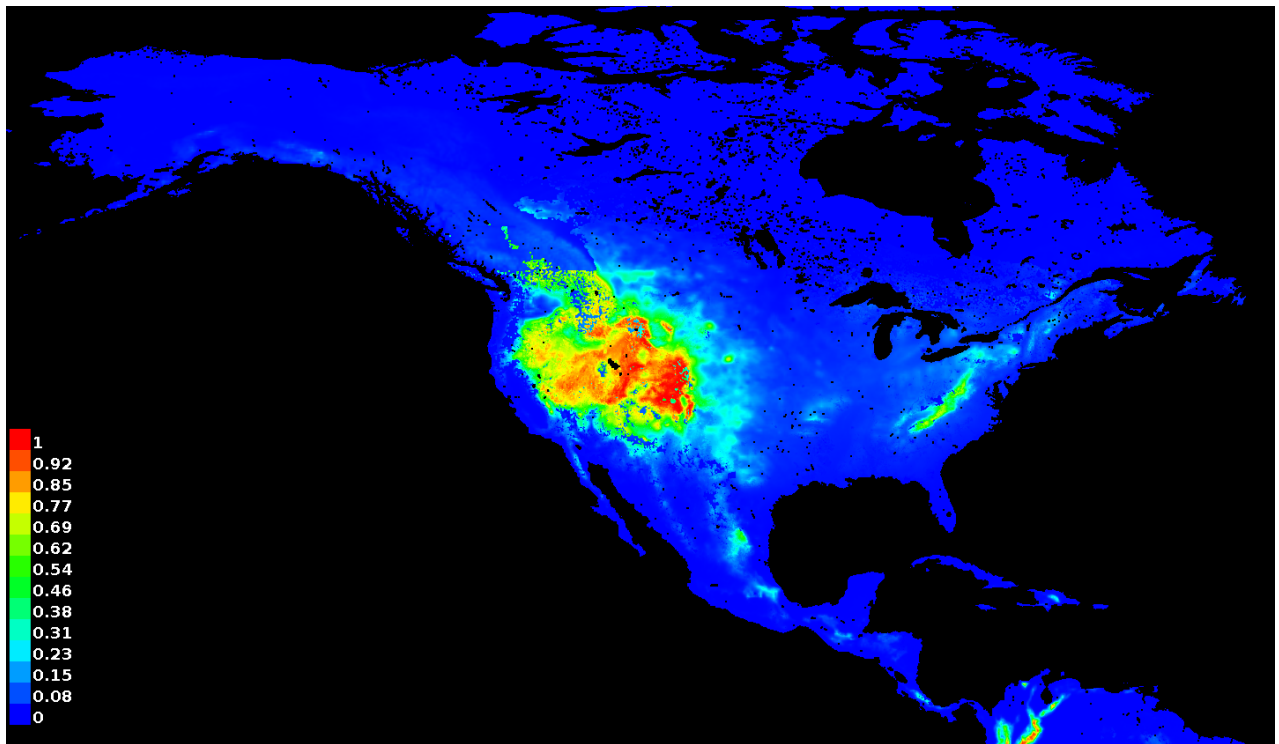

622

623

624 **Fig S5: Base putative distribution model of *D. flavomontana*.** Created with MaxEnt v3.4 with a  
625 10-fold cross-validation run. The average test AUC for the replicate runs is 0.94, and the standard  
626 deviation is 0.058. We used the maximum training sensitivity plus specificity threshold to  
627 distinguish between suitable and unsuitable areas.

**Table S1:** Summaries of model that fit maximum environmental temperature (Tmax) to either CTmax, LT80 or TFL80 independently of each other. All models fit with upper physiological limits interacting with annual precipitation (Pann). R<sup>2</sup> given for maximal model. Terms retained after AIC model selection shown in italics. All models are phylogenetically controlled, with no significant phylogenetic signal found in any case (Pagel's lambda not significantly different to 0). All predictors centred and scaled.

| <b>Full Model</b> | <b>Terms</b>      | <b>DF</b> | <b>F</b> | <b>P</b> | <b>adjR<sup>2</sup></b> |
|-------------------|-------------------|-----------|----------|----------|-------------------------|
| Tmax~CTmax*Pann   | <i>CTmax*Pann</i> | 1,39      | 6.092    | 0.018    | 0.371                   |
|                   | CTmax             |           | 9.351    | 0.004    |                         |
|                   | Pann              |           | 12.282   | 0.001    |                         |
| Tmax~LT80*Pann    | LT80*Pann         | 1,39      | 0.995    | 0.325    | 0.306                   |
|                   | <i>LT80</i>       |           | 14.311   | <0.001   |                         |
|                   | <i>Pann</i>       |           | 6.247    | 0.017    |                         |
| Tmax~TFL80*Pann   | TFL80*Pann        | 1,39      | 0.531    | 0.471    | 0.544                   |
|                   | <i>TFL80</i>      |           | 4.706    | <0.001   |                         |
|                   | <i>Pann</i>       |           | 3.551    | 0.001    |                         |

628

**Table S2:** Summaries of model that fit either TFL80, LT80 or CTmax to Maximum Environmental temperature (Tmax). Species from ‘wet’ environments (Pann > 1000 ml) and ‘dry’ (Pann < 1000ml) modelled separately. All models are phylogenetically controlled, with no significant phylogenetic signal found in any case (Pagel’s lambda not significantly different to 0).

| <b>Species group</b> | <b>Full Model</b> | <b>Terms</b> | <b>DF</b> | <b>F</b> | <b>P</b> | <b>adjR<sup>2</sup></b> |
|----------------------|-------------------|--------------|-----------|----------|----------|-------------------------|
| Dry                  | Tmax~CTmax        | CTmax        | 1,18      | 19       | <0.001   | 0.487                   |
|                      | Tmax~TFL80        | TFL80        | 1,18      | 39.858   | <0.001   | 0.672                   |
|                      | Tmax~LT80         | LT80         | 1,18      | 13.47    | 0.002    | 0.396                   |
| Wet                  | Tmax~CTmax        | CTmax        | 1,21      | 0.456    | 0.505    | 0.025                   |
|                      | Tmax~TFL80        | TFL80        | 1,21      | 6.40     | 0.019    | 0.197                   |
|                      | Tmax~LT80         | LT80         | 1,21      | 1.56     | 0.225    | 0.025                   |

629



**Table S3:** Summary of model in which both TFL80 and CTmax are included as predictors of maximum environmental temperature (Tmax). R<sup>2</sup> shown for full model. Model was phylogenetically controlled, but no significant phylogenetic signal in residuals was detected. LT80 is excluded as a predictor based on high VIF scores indicating variance-inflating autocorrelation with both other predictors.

| <b>Full Model</b>          | <b>Terms</b> | <b>DF</b> | <b>F</b> | <b>P</b> | <b>adjR<sup>2</sup></b> |
|----------------------------|--------------|-----------|----------|----------|-------------------------|
| Tmax~CTmax*Pann+TFL80*Pann | CTmax*Pann   | 1,37      | 0.164    | 0.688    | 0.531                   |
|                            | TFL80*Pann   |           | 0.329    | 0.569    |                         |
|                            | CTmax        |           | 0.985    | 0.327    |                         |
|                            | Pann         |           | 12.814   | <0.001   |                         |
|                            | TFL80        |           | 38.254   | <0.001   |                         |

630

631

**Table S4: Husbandry details for species used in this study. All species either *D* = *Drosophila* or *Z* = *Zaprionus***

| <u>Species</u>         | <u>Rearing temp (°C)</u> | <u>StrainID &amp; source</u>                               | <u>Multiple lines</u> | <u>Food</u> | <u>Mean age at heat (days)</u> | <u>Temperature stress range (°C)</u> |
|------------------------|--------------------------|------------------------------------------------------------|-----------------------|-------------|--------------------------------|--------------------------------------|
| <i>D. affinis</i>      | 18                       | DSSC Stock #: 14012-0141.14                                | N                     | M           | 7                              | 29 – 36                              |
| <i>D. albomicans</i>   | 23                       | DSSC Stock #: 15112-1751.03                                | N                     | A           | 7                              | 31 – 36                              |
| <i>D. aldrichi</i>     | 23                       | Wild caught single line, Texas 2019                        | N                     | A           | 7                              | 33 – 40                              |
| <i>D. americana</i>    | 23                       | Single-line from (35)                                      | N                     | M           | 7                              | 33 – 38                              |
| <i>D. ananassae</i>    | 25                       | Single-line from (35)                                      | N                     | A           | 7                              | 30 – 38                              |
| <i>D. arizonae</i>     | 23                       | DSSC Stock #: 14012-0181.02                                | N                     | B           | 7                              | 35 – 41                              |
| <i>D. biarmipes</i>    | 23                       | DSSC Stock #: 14023-0361.11                                | N                     | A           | 7                              | 30 – 35                              |
| <i>D. bifasciata</i>   | 18                       | DSSC Stock #: 14012-0181.02                                | N                     | A           | 7                              | 25 – 34                              |
| <i>D. bipectinata</i>  | 23                       | DSSC Stock #: 14024-0381.20                                | N                     | A           | 7                              | 30 – 36                              |
| <i>D. borealis</i>     | 23                       | DSSC Stock #: 15010-0961.10                                | N                     | A           | 14                             | 31 – 39                              |
| <i>D. buzzatii</i>     | 23                       | Single-line from (35)                                      | N                     | M           | 7                              | 32 – 39                              |
| <i>D. eohydei</i>      | 23                       | DSSC Stock #: 15085-1631.00                                | N                     | B           | 14                             | 31 – 38                              |
| <i>D. erecta</i>       | 23                       | Single-line from (35)                                      | N                     | A           | 7                              | 29 – 39                              |
| <i>D. flavomontana</i> | 23                       | Single-line from (35)                                      | N                     | M           | 14                             | 30 – 37                              |
| <i>D. hydei</i>        | 25                       | Mixed, long-term lab population at University of Liverpool | Y                     | B           | 14                             | 29 – 37                              |
| <i>D. laticola</i>     | 23                       | Single-line from (35)                                      | N                     | M           | 7                              | 31 – 37                              |
| <i>D. littoralis</i>   | 23                       | DSSC Stock #: 15010-1001.03                                | N                     | B           | 14                             | 32 – 37                              |
| <i>D. lummei</i>       | 23                       | DSSC Stock #:                                              | N                     | M           | 7                              | 25 – 37                              |

|                         |    |                                                               |   |    |    |         |
|-------------------------|----|---------------------------------------------------------------|---|----|----|---------|
|                         |    | 15010-1011.07                                                 |   |    |    |         |
| <i>D. madeirensis</i>   | 18 | Mix of 3 lines, wild caught March 2019                        | Y | A  | 7  | 27 – 34 |
| <i>D. mayaguana</i>     | 23 | DSSC Stock #: 15081-1397.00                                   | N | M  | 7  | 35 – 40 |
| <i>D. melanogaster</i>  | 25 | 'Dahommey' lab population                                     | Y | A  | 7  | 30 – 38 |
| <i>D. mercatorum</i>    | 23 | Wild-caught Madeira 2018, single line                         | N | A  | 7  | 31 – 40 |
| <i>D. micromelanica</i> | 23 | DSSC Stock #: 15030-1151.01                                   | N | A  | 7  | 30 – 38 |
| <i>D. melanica</i>      | 23 | DSSC Stock #: 15030-1141.03                                   | N | A  | 7  | 32 – 38 |
| <i>D. mojavensis</i>    | 23 | Multi-line mixed population from (35)                         | Y | B  | 7  | 34 – 41 |
| <i>D. montana</i>       | 18 | Mixed population of IsoLines in (36)                          | Y | M* | 21 | 31 – 37 |
| <i>D. nasuta</i>        | 23 | DSSC Stock #: 15112-1781.13                                   | N | A  | 7  | 30 – 37 |
| <i>D. novamexicana</i>  | 23 | Multi-line mixed population from (35)                         | Y | B  | 7  | 28 – 38 |
| <i>D. obscura</i>       | 23 | Multi-line mixed population from (35)                         | Y | P  | 7  | 28 – 33 |
| <i>D. paranaensis</i>   | 23 | DSSC Stock #: 15082-1541.09                                   | N | A  | 7  | 31 – 37 |
| <i>D. pseudoobscura</i> | 18 | Mixed population if IsoLines in                               | Y | A* | 7  | 29 – 35 |
| <i>D. repleta</i>       | 23 | DSSC Stock #: 15084-1611.01                                   | N | A  | 7  | 30 – 38 |
| <i>D. santomea</i>      | 23 | Single-line rom (35)                                          | N | A  | 7  | 29 – 37 |
| <i>D. sechellia</i>     | 23 | Multi-line mixed population from (35)                         | Y | P  | 7  | 29 – 37 |
| <i>D. simulans</i>      | 25 | Mixed of laboratory lines collected across Europe 2016 - 2018 | Y | A  | 7  | 30 – 37 |
| <i>D. subobscura</i>    | 18 | Mixed population from Lines                                   | Y | A  | 7  | 27 – 34 |

|                               |    |                                                                                                             |   |   |   |         |
|-------------------------------|----|-------------------------------------------------------------------------------------------------------------|---|---|---|---------|
| <i>D. suzukii</i>             | 23 | Mixed populations of 3 IsoLines caught in Madeira (March 2018) and single lines each from the USA and Japan | Y | A | 7 | 27 – 37 |
| <i>D. takahashii</i>          | 23 | Single-line from (35)                                                                                       | N | A | 7 | 30 – 37 |
| <i>D. teissieri</i>           | 23 | Single-line from (35)                                                                                       | N | A | 7 | 28 – 37 |
| <i>D. virilis</i>             | 23 | Multi-line mixed population from (35)                                                                       | Y | P | 7 | 26 – 38 |
| <i>D. yakuba</i>              | 23 | Multi-line mixed population from (35)                                                                       | Y | A | 7 | 3 – 38  |
| <i>Zaprionus indianus</i>     | 23 | Single line, wild caught 2019                                                                               | N | B | 7 | 33 – 39 |
| <i>Zaprionus tuberculatus</i> | 23 | DSSC Stock #: 50001-0001.07                                                                                 | Y | B | 7 | 33– 38  |

632

633 **Supplementary text**

634

635 **Repeatability of 4-hour heating assay:**

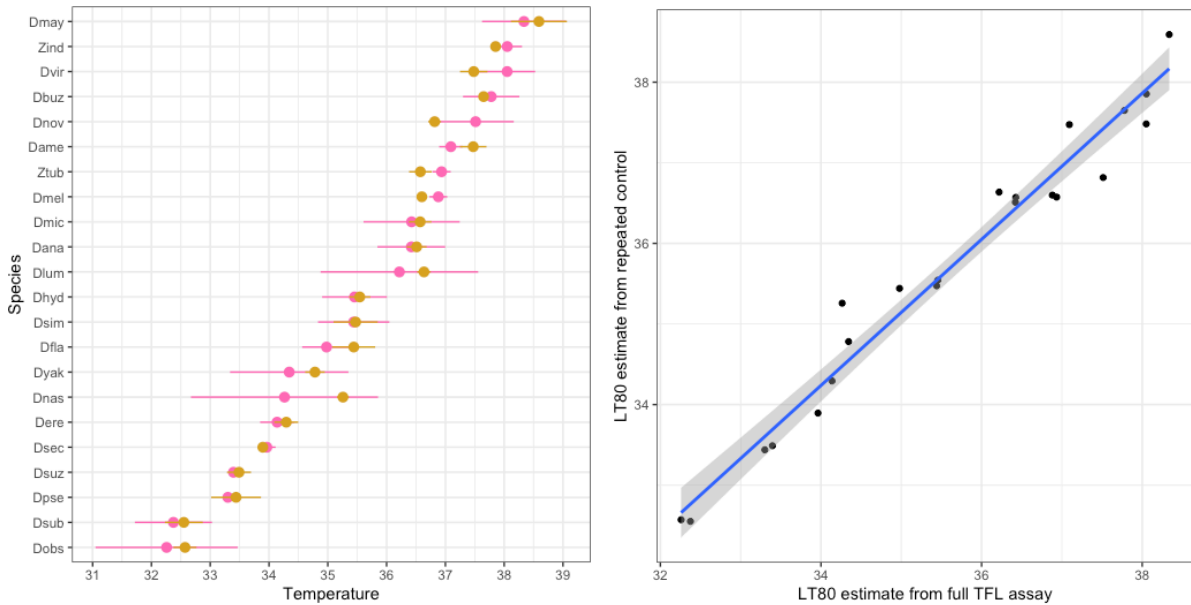

636

637 **Fig ST1.1: Repeatability of LT80.** Repeatability was high across the 22 *Drosophila* species  
638 **tested.** Left panel: There was no significant difference in the estimate of LT80 between full  
639 TFL runs and control repeats in any of these species (significance measured as non-  
640 overlapping CIs of point estimates of LT80). Pink points = estimate from full TFL assay, gold  
641 point = estimate from simultaneous multispecies LT80 assay. Right panel: The correlation  
642 between the two independent measurements of LT80 across these species was strongly  
643 positive and explained a high degree of variation in the data (coefficient = 1.06,  $R^2 = 0.96$ ).

644

645

646

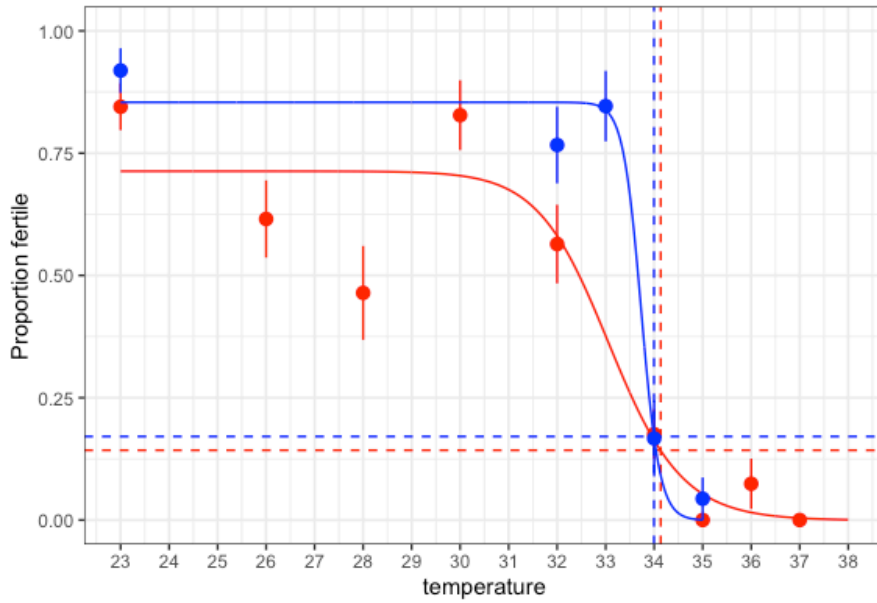

647  
648 **Figure ST1.2: Repeatability of TFL80 for *Drosophila virilis*.** We fully independently repeated  
649 the TFL80 assay for one species in which we found a significant difference between LT80  
650 and TFL80. Two independent runs of sexually mature males were conducted by two  
651 researchers 6 months apart. Red = original data used to calculate TFL80 for *D. virilis* in this  
652 manuscript, blue = repeated assay. Dashed lines intersect at 80% threshold. Line fits  
653 predicted by 3-parameter dose-response model. The fly stock and equipment were  
654 identical.

655  
656  
657  
658  
659  
660  
661  
662  
663  
664  
665  
666  
667  
668  
669  
670  
671  
672

673 Repeatability of knockdown CTmax assay

674

675

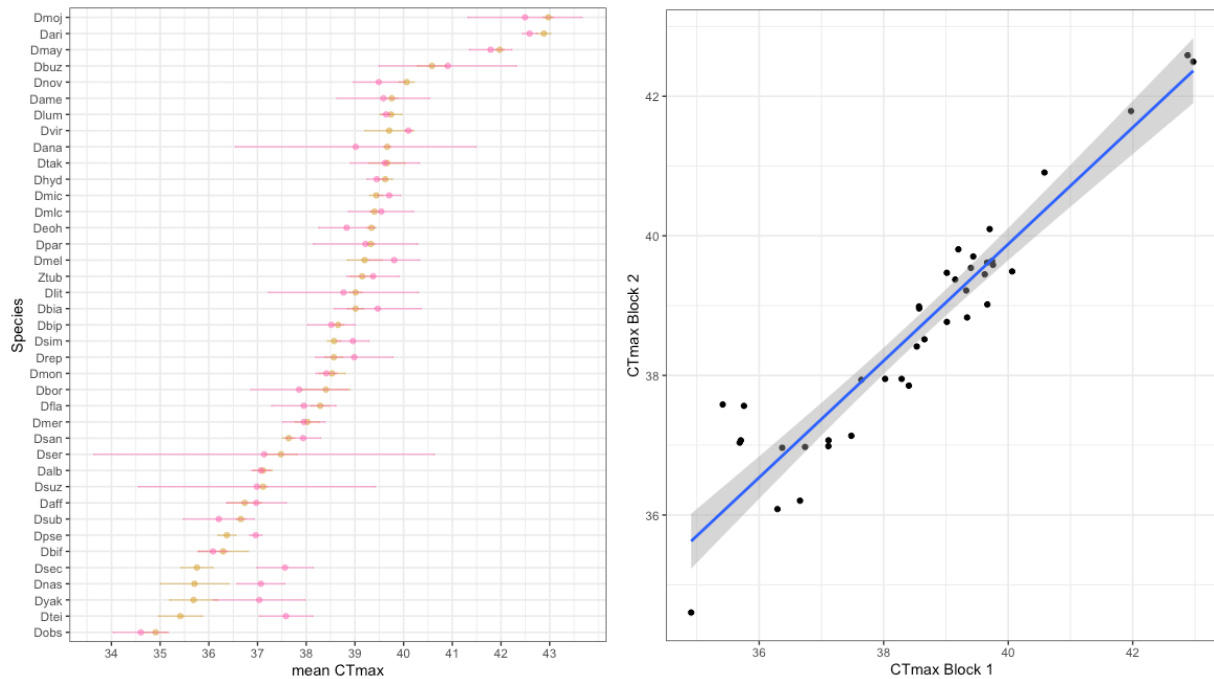

676

677

678 **Fig S2.1: Knockdown CTmax assays were generally highly repeatable.** Left panel; mean CTmax

679 temperature recorded from species' independent assays (gold points), and in mixed species

680 control blocks (pink points). There was no global significant difference between CTmax

681 estimates across all species (Block:  $F_{1,831} = 3.246$ ,  $P = 0.072$ ). However a significant experimental

682 block\*species interaction was found for 4 of the 41 species tested (interaction term:  $F_{40,831} =$

683  $3.7589$ ,  $P < 0,001$ ); *Drosophila sechelia*, *D. nasuta*, *D. yakuba* & *D. tiesseri* all scored significantly

684 higher CTmax in our mixed species control block than in their own individual CTmax assays.

685 Right panel: The correlation between estimated CTmax values from both blocks was strongly

686 positive (coefficient = 1.07,  $F_{1,37} = 309.84$ ,  $P < 0.001$ ), and explained 89% of the variation.

687

688

689 Correlations between TFL, LT and CTmax

690 The correlation between TFL80 and LT80 is significant (PGLS:  $F_{1,41} = 47.86$ ,  $P < 0.001$ , coefficient  
691 = 1.631) but LT80 only explains just over half of the variation in TFL80 (PGLS:  $\text{adj}R^2 = 0.53$ ),

692

693 The correlation between absolute TFL80 and CTmax assays is significant (PGLS:  $F_{1,41} = 19.40$ ,  $P$   
694  $< 0.001$ ) but considerably weaker than a perfect proxy (PGLS:  $R^2 = 0.30$ , coefficient = 0.631).

695 These analyses were phylogenetically controlled, with no significant phylogenetic signal found  
696 among model residuals ( $\lambda = 0.543^{\text{ns}}$ ).

697

698 The correlation between the two measures of upper lethal limits (LT80 and knockdown CTmax)  
699 is significant and positive (estimate = 0.668,  $F_{1,41} = 89.176$ ,  $P < 0.001$ ) but also shallower than  
700 would be expected of exact proxies. However, this relationship explains 67.74% of the variation  
701 in LT80 across species. LT80 and knockdown CTmax are different measures of upper thermal  
702 limits and so deviation from parity is not unexpected. Notably, knockdown CTmax inherently  
703 contains an element of thermal ramping, whilst LT80 employs a single static temperature.  
704 These analyses were phylogenetically controlled, with a significant phylogenetic signal found  
705 among model residuals ( $\lambda = 0.570^{**}$ ).

706

707 The difference between TFL80 and LT80 ( $\Delta\text{Limits}$ ) shows no significant relationship with either  
708 CTmax or LT80 (PGLS; knockdown CTmax: coefficient = 0.042,  $F_{1,41} = 0.127$ ,  $P = 0.72$ ,  $R^2 = -0.02$ ;  
709 LT80: coefficient = -0.015,  $F_{1,41} = 0.011$ ,  $P = 0.92$ ,  $R^2 = 0.02$ ). This demonstrates that critical limits  
710 cannot be used as a direct proxy for TFLs, and so TFLs are capturing biological variation that  
711 measurements of critical limits do not. This also suggests that there is not simply an  
712 unavoidable upper limit to fertility shared among species with differing upper critical limits.

713

714

715



716 Phylogenetic signal in upper thermal limits

717 Previous empirical work has found that absolute upper critical limits show strong phylogenetic  
718 signal(37). This suggests that these limits may be difficult to rapidly evolve in response to  
719 changes in the environment and suggests that species are sorted into their environment by  
720 their evolutionary history, rather than locally adapted to it(4). We find similar degrees of  
721 phylogenetic signal in our measures of critical upper limits (LT80  $\lambda = 0.94$   $P_0 < 0.001$ ,  $P_1 = 0.108$ ;  
722  $\kappa = 0.866$ ,  $P = 0.001$ ), ( $CT_{max}$   $\lambda = 0.853$ ,  $P_0 < 0.001$ ,  $P_1 < 0.001$ ;  $\kappa = 0.51$ ,  $P < 0.001$ ). We also find  
723 phylogenetic signal in our estimate of TFL80, however it is less strong than the signal for either  
724 upper lethal limit ( $\lambda = 0.722$ ,  $P_0 = 0.01$ ,  $P_1 = 0.004$ ;  $\kappa = 0.32$ ,  $P = 0.005$ ). The difference between  
725 LT80 and TFL80 ( $\Delta$ Limits hereafter) are explained by evolutionary relatedness between species  
726 ( $\lambda = 0.823$ ,  $P_0 = < 0.001$ ,  $P_1 = 0.024$ ,  $\kappa = 0.857$ ,  $P = 0.001$ ), but this is primarily because the  
727 majority of species in the *Sophophora* subgenus have a  $\Delta$ Limit of 0°C. Whether this means that  
728 species are able to rapidly evolve TFLs within the range of their  $\Delta$ Limits is an open question.
